# Supplementary material for: Applying normalization process theory to understand implementation of a family violence screening and care model in maternal and child health nursing practice: a mixed method process evaluation of a randomised controlled trial
Source: Springer Nature journal article supplement (doi:10.1186/s13012-015-0230-4), 2015-03-27
Supplement: MOESM1 [file 9772990]

## MOVE Maternal and Child Health nurses' online survey analysis using NPT

### Coherence

|                                                                                                                         | Interim Survey (S1) Results |             |                       |             |              | Impact Survey (S2) Results |                 |      |                       |      |         | Difference             |         |                        |         |
|-------------------------------------------------------------------------------------------------------------------------|-----------------------------|-------------|-----------------------|-------------|--------------|----------------------------|-----------------|------|-----------------------|------|---------|------------------------|---------|------------------------|---------|
|                                                                                                                         | MOVE Group (IG)             | %           | Comparison Group (CG) | %           | p value      |                            | MOVE Group (IG) | %    | Comparison Group (CG) | %    | p value | Overall change IG-IG % | p value | Overall change CG-CG % | p value |
| It is important to screen all women for FV (64/57)                                                                      | 61 (agree)                  | 95.3        | 55                    | 96.5        | 0.74         | NA                         |                 |      |                       |      |         |                        |         |                        |         |
| MCH nurse interventions can make a difference to the lives of women and children experiencing FV (64/57)                | 61 (agree)                  | 95.3        | 53                    | 93          | 0.58         | NA                         |                 |      |                       |      |         |                        |         |                        |         |
| <b>I think asking questions about FV at the 4 week consultation is important (56/53)</b>                                | <b>25 (agree)</b>           | <b>44.6</b> | <b>39</b>             | <b>73.6</b> | <b>0.002</b> | NA                         |                 |      |                       |      |         |                        |         |                        |         |
| It is important to have a consultation at 3-4 months specifically addressing the mother's health and well-being (56/53) | 47 (agree)                  | 83.9        | 46                    | 86.8        | 0.67         | (55/52)                    | 51              | 92.7 | 48                    | 92.3 | 0.93    | ↑8.8                   | 0.15    | ↑5.5                   | 0.36    |
| I am fulfilling an important community role in discussing FV with my clients (52/50)                                    | 50 (agree)                  | 96.1        | 48                    | 96          | 0.97         | NA                         |                 |      |                       |      |         |                        |         |                        |         |
| The FV screening protocol in the new government framework has been very welcome (64/57)                                 | 45 (agree)                  | 70.3        | 43                    | 75.4        | 0.53         | NA                         |                 |      |                       |      |         |                        |         |                        |         |
| I have a good understanding of the issues for women and children experiencing FV (60/56)                                | 51 (agree)                  | 85          | 45                    | 80.4        | 0.51         | (55/52)                    | 48              | 87.3 | 47                    | 90.4 | 0.61    | ↑2.3                   | 0.73    | ↑10.0                  | 0.14    |

|                                                                                             | Interim Survey (S1) Results |      |                       |      |         | Impact Survey (S2) Results |                 |      |                       |      |             | Difference             |             |                        |              |
|---------------------------------------------------------------------------------------------|-----------------------------|------|-----------------------|------|---------|----------------------------|-----------------|------|-----------------------|------|-------------|------------------------|-------------|------------------------|--------------|
|                                                                                             | MOVE Group (IG)             | %    | Comparison Group (CG) | %    | p value |                            | MOVE Group (IG) | %    | Comparison Group (CG) | %    | p value     | Overall change IG-IG % | p value     | Overall change CG-CG % | p value      |
| It is part of my job to have the time to support women experiencing family violence (64/57) | 55(agree)                   | 85.9 | 50                    | 87.7 | 0.77    | (55/52)                    | 52              | 94.5 | 49                    | 94.2 | 0.94        | ↑8.6                   | 0.12        | ↑6.5                   | 0.24         |
| <b>I feel uncomfortable when I have to ask all women about FV (64/57)</b>                   | 30 (disagree)               | 46.9 | 30                    | 52.6 | 0.53    | (55/52)                    | 36              | 65.5 | 24                    | 46.2 | <b>0.04</b> | ↑ 18.6                 | <b>0.04</b> | ↓ 6.4                  | 0.5          |
| <b>I feel frustrated when women who are abused don't act on my advice (64/57)</b>           | 30(disagree)                | 46.9 | 21                    | 36.8 | 0.26    | (55/51)                    | 29              | 52.7 | 34                    | 66.7 | 0.14        | ↑5.8                   | 0.52        | ↑29.9                  | <b>0.002</b> |
| I am busy enough without also having to screen all women for FV (64/57)                     | 50(disagree)                | 78.1 | 50                    | 87.7 | 0.16    | (51/54)                    | 42              | 82.4 | 47                    | 87   | 0.5         | ↑4.3                   | 0.57        | ↓0.7                   | 0.91         |
| It is the role of the Enhanced nurse team to deal with issues of FV, not mine (52/50)       | 45(disagree)                | 86.5 | 38                    | 76   | 0.17    | (53/52)                    | 45              | 84.9 | 44                    | 84.6 | 0.97        | ↑1.6                   | 0.81        | ↑8.6                   | 0.27         |

## Cognitive Participation

|                                                                                                        | Interim Survey (S1) Results |      |                       |      |         | Impact Survey (S2) Results |                 |      |                       |      |              | Difference             |         |                        |         |
|--------------------------------------------------------------------------------------------------------|-----------------------------|------|-----------------------|------|---------|----------------------------|-----------------|------|-----------------------|------|--------------|------------------------|---------|------------------------|---------|
|                                                                                                        | MOVE Group (IG)             | %    | Comparison Group (CG) | %    | p value |                            | MOVE Group (IG) | %    | Comparison Group (CG) | %    | p value      | Overall change IG-IG % | p value | Overall change CG-CG % | p value |
| In the past 6 months I have experienced barriers to asking about FV at 4 weeks                         | NA                          |      |                       |      |         | Yes (54/52)                | 48              | 88.9 | 40                    | 76.9 | 0.1          |                        |         |                        |         |
| Overall, what percentage of women have you been able to ask about FV at any time in the past 6 months? | NA                          |      |                       |      |         | > 50% (55/52)              | 45              | 81.8 | 44                    | 84.6 | 0.7          |                        |         |                        |         |
| <b>At what visit are you most likely to ask about FV?</b>                                              | NA                          |      |                       |      |         | ≤ 4weeks (53/51)           | 33              | 62.3 | 45                    | 88.2 | <b>0.002</b> |                        |         |                        |         |
| I ask women who disclose FV about the impact on, and safety of, their children (60/56)                 | 50                          | 83.3 | 49                    | 87.5 | 0.53    | Yes (55/52)                | 50              | 90.9 | 47                    | 90.4 | 0.93         | ↑7.6                   | 0.23    | ↑2.9                   | 0.63    |
| I have used the following resources in talking with women about FV (53/51)                             |                             |      |                       |      |         | (54/51)                    |                 |      |                       |      |              |                        |         |                        |         |
| Government practice guidelines                                                                         | 45                          | 84.9 | 47                    | 92.1 | 0.25    |                            | 51              | 94.4 | 48                    | 94.1 | 0.94         | ↑9.5                   | 0.1     | ↑2                     | 0.7     |
| The Common Risk Assessment Framework (CRAF)                                                            | 28                          | 52.8 | 30                    | 58.8 | 0.54    |                            | 35              | 64.8 | 34                    | 66.7 | 0.84         | ↑12                    | 0.21    | ↑7.9                   | 0.41    |
| Websites                                                                                               | 6                           | 11.3 | 6                     | 11.8 | 0.94    |                            | 7               | 13   | 11                    | 21.6 | 0.24         | ↑1.7                   | 0.79    | ↑9.8                   | 0.18    |
| Nurse mentor-IG only                                                                                   | 20                          | 37.7 |                       |      |         |                            | 28              | 51.9 |                       |      |              | ↑14.2                  | 0.14    |                        |         |
| FV Liaison Worker                                                                                      | 14                          | 26.4 |                       |      |         |                            | 19              | 35.2 |                       |      |              | ↑8.8                   | 0.33    |                        |         |
| MOVE MWB checklist                                                                                     | 53                          | 100  |                       |      |         |                            | 52              | 96.3 |                       |      |              | ↓3.7                   | 0.5*    |                        |         |
| MOVE Clinical practice guidelines                                                                      | 37                          | 69.8 |                       |      |         |                            | 40              | 74.1 |                       |      |              | ↑4.3                   | 0.62    |                        |         |
| MOVE clinical pathway                                                                                  | 34                          | 64.2 |                       |      |         |                            | 36              | 66.7 |                       |      |              | ↑2.5                   | 0.78    |                        |         |

## Collective Action

|                                                                                                                         | Interim Survey (S1) Results |      |                       |      |             | Impact Survey (S2) Results |                 |      |                       |      |         | Difference             |         |                        |             |
|-------------------------------------------------------------------------------------------------------------------------|-----------------------------|------|-----------------------|------|-------------|----------------------------|-----------------|------|-----------------------|------|---------|------------------------|---------|------------------------|-------------|
|                                                                                                                         | MOVE Group (IG)             | %    | Comparison Group (CG) | %    | p value     | Impact survey responses    | MOVE Group (IG) | %    | Comparison Group (CG) | %    | p value | Overall change IG-IG % | p value | Overall change CG-CG % | p value     |
| <b>Interactional workability</b>                                                                                        |                             |      |                       |      |             |                            |                 |      |                       |      |         |                        |         |                        |             |
| I feel our team of nurses as a group is seriously trying to improve our engagement with clients experiencing FV (52/50) | 44 (agree)                  | 84.6 | 40                    | 80   | 0.54        | (54/52)                    | 47              | 87   | 41                    | 78.8 | 0.26    | ↑2.4                   | 0.72    | ↓1.2                   | 0.89        |
| There are people in my MCHN team who encourage the team's FV work                                                       | NA                          |      |                       |      |             | (54/52)                    | 45              | 83.3 | 36                    | 69.2 | 0.09    |                        |         |                        |             |
| <b>Relational integration</b>                                                                                           |                             |      |                       |      |             |                            |                 |      |                       |      |         |                        |         |                        |             |
| <b>I get professional support from my MCH colleagues in FV work (64/56)</b>                                             | 53 (agree)                  | 82.8 | 40                    | 71.4 | 0.14        | (55/53)                    | 47              | 85.5 | 46                    | 86.8 | 0.84    | ↑2.7                   | 0.69    | ↑15.4                  | <b>0.05</b> |
| I feel supported by my team leader in doing this work (52/50)                                                           | 36 (agree)                  | 69.2 | 30                    | 60   | 0.33        | (54/52)                    | 35              | 64.8 | 38                    | 73.1 | 0.36    | ↓4.4                   | 0.63    | ↑13.1                  | 0.16        |
| I can turn to my colleagues for emotional support when I am doing this work (64/56)                                     | 57 (agree)                  | 89.1 | 45                    | 80.3 | 0.18        | (55/53)                    | 46              | 83.6 | 44                    | 83   | 0.93    | ↓5.5                   | 0.39    | ↑2.7                   | 0.72        |
| <b>I don't</b> feel safe visiting women in their homes by myself when there may be FV (64/56)                           | 44 (agree)                  | 68.8 | 32                    | 57.1 | 0.19        | NA                         |                 |      |                       |      |         |                        |         |                        |             |
| <b>I feel safe in my workplace asking women about FV (64/56)</b>                                                        | 53 (agree)                  | 82.8 | 53                    | 94.6 | <b>0.04</b> | (55/53)                    | 51              | 92.7 | 50                    | 94.3 | 0.73    | ↑9.9                   | 0.1     | ↓0.3                   | 0.94        |

|                                                                                                             | Interim Survey (S1) Results |      |                       |      |         | Impact Survey (S2) Results |                 |      |                       |      |             | Difference             |         |                        |             |
|-------------------------------------------------------------------------------------------------------------|-----------------------------|------|-----------------------|------|---------|----------------------------|-----------------|------|-----------------------|------|-------------|------------------------|---------|------------------------|-------------|
|                                                                                                             | MOVE Group (IG)             | %    | Comparison Group (CG) | %    | p value | Impact survey responses    | MOVE Group (IG) | %    | Comparison Group (CG) | %    | p value     | Overall change IG-IG % | p value | Overall change CG-CG % | p value     |
| <b>I feel that our work practices mean I feel safe when visiting women at home</b>                          | NA                          |      |                       |      |         | Agree (56/53)              | 46              | 82.1 | 33                    | 62.3 | <b>0.02</b> |                        |         |                        |             |
| <b>Skill set workability</b>                                                                                |                             |      |                       |      |         |                            |                 |      |                       |      |             |                        |         |                        |             |
| I have enough training and skills to ask and respond to women when screening for FV (60/56)                 | 45 (agree)                  | 75   | 43                    | 76.8 | 0.82    | (55/52)                    | 47              | 85.5 | 44                    | 84.6 | 0.9         | ↑10.5                  | 0.16    | ↑7.8                   | 0.3         |
| I know how to ask women about their safety (60/56)                                                          | 53 (agree)                  | 88.3 | 54                    | 96.4 | 0.1     | NA                         |                 |      |                       |      |             |                        |         |                        |             |
| I know how to make a safety plan with women (60/56)                                                         | 50 (agree)                  | 83.3 | 44                    | 78.6 | 0.51    | (55/52)                    | 48              | 87.3 | 43                    | 82.7 | 0.5         | ↓4.0                   | 0.55    | ↑4.1                   | 0.59        |
| I prefer to have a rapport with women before I ask her about FV (60/56)                                     | 43 (agree)                  | 71.7 | 35                    | 62.5 | 0.29    | NA                         |                 |      |                       |      |             |                        |         |                        |             |
| <b>I understand why women don't leave partners who are abusing them (60/56)</b>                             | 52 (agree)                  | 86.7 | 46                    | 82.1 | 0.5     | (55/52)                    | 50              | 90.9 | 50                    | 96.2 | 0.27        | ↑4.2                   | 0.47    | ↑14.1                  | <b>0.02</b> |
| If women ask me for help for their abusive partners, I know what information to give women (60/56)          | 54 (agree)                  | 90   | 48                    | 85.7 | 0.48    | (55/52)                    | 51              | 92.7 | 47                    | 90.4 | 0.66        | ↑2.7                   | 0.6     | ↑4.7                   | 0.46        |
| I know how to ask women from CALD communities about FV and respond in a culturally sensitive manner (60/56) | 39 (agree)                  | 65   | 38                    | 67.9 | 0.74    | (55/52)                    | 34              | 61.8 | 31                    | 59.6 | 0.82        | ↓3.2                   | 0.72    | ↓8.3                   | 0.37        |
| I know how to ask women from ATSI communities about FV and respond in a culturally sensitive manner (60/56) | 27 (agree)                  | 45   | 34                    | 60.7 | 0.09    | (55/52)                    | 28              | 50.9 | 27                    | 51.9 | 0.92        | ↑5.9                   | 0.53    | ↓8.8                   | 0.36        |

|                                                                                                         | Interim Survey (S1) Results |      |                        |      |         | Impact Survey (S2) Results |                 |      |                        |      |         | Difference             |         |                        |         |
|---------------------------------------------------------------------------------------------------------|-----------------------------|------|------------------------|------|---------|----------------------------|-----------------|------|------------------------|------|---------|------------------------|---------|------------------------|---------|
|                                                                                                         | MOVE Group (IG)             | %    | Comparis on Group (CG) | %    | p value | Impact survey responses    | MOVE Group (IG) | %    | Comparis on Group (CG) | %    | p value | Overall change IG-IG % | p value | Overall change CG-CG % | p value |
| I can confidently document situations where FV is discussed (60/56)                                     | 52 (agree)                  | 86.7 | 46                     | 82.1 | 0.5     | (55/52)                    | 50              | 90.9 | 43                     | 82.7 | 0.21    | ↑4.2                   | 0.47    | ↑0.6                   | 0.94    |
| I understand how FV services work (56/53)                                                               | 36 (agree)                  | 64.3 | 32                     | 60.4 | 0.67    | (55/52)                    | 37              | 67.3 | 36                     | 69.2 | 0.83    | ↑3.0                   | 0.74    | ↑8.8                   | 0.34    |
| I am aware of the role of community police in working with women experiencing FV (56/53)                | 37 (agree)                  | 66.1 | 37                     | 69.8 | 0.68    | (55/52)                    | 39              | 70.9 | 35                     | 67.3 | 0.69    | ↑4.8                   | 0.58    | ↓2.5                   | 0.78    |
| I know how to make a referral to Child FIRST (60/56)                                                    | 54 (agree)                  | 90   | 51                     | 91.1 | 0.84    | NA                         |                 |      |                        |      |         |                        |         |                        |         |
| I know how to make a referral to Child Protection (60/56)                                               | 55 (agree)                  | 91.7 | 54                     | 96.4 | 0.28    | NA                         |                 |      |                        |      |         |                        |         |                        |         |
| I understand the rights of women experiencing FV to access legal, financial and housing support (56/53) | 48 (agree)                  | 85.7 | 46                     | 86.8 | 0.87    | NA                         |                 |      |                        |      |         |                        |         |                        |         |
| <b>Contextual integration</b>                                                                           |                             |      |                        |      |         |                            |                 |      |                        |      |         |                        |         |                        |         |
| The CRAF is easy to use (56/53)                                                                         | 32 (agree)                  | 57.1 | 29                     | 54.7 | 0.8     | NA                         |                 |      |                        |      |         |                        |         |                        |         |
| I have used the CRAF in the past 6 months (56/53)                                                       | 23 (agree)                  | 41.1 | 23                     | 43.4 | 0.81    | NA                         |                 |      |                        |      |         |                        |         |                        |         |
| I find FV services responsive when I make a referral (56/53)                                            | 26 (agree)                  | 46.4 | 22                     | 41.5 | 0.61    | NA                         |                 |      |                        |      |         |                        |         |                        |         |
| In the past 6 months I have had difficulty getting appropriate support for women experiencing FV        | NA                          |      |                        |      |         | Yes (55/49)                | 11              | 20   | 8                      | 16.3 | 0.63    |                        |         |                        |         |

|                                                                                                                   | Interim Survey (S1) Results |      |                       |      |             | Impact Survey (S2) Results |                 |      |                       |      |         | Difference             |         |                        |         |
|-------------------------------------------------------------------------------------------------------------------|-----------------------------|------|-----------------------|------|-------------|----------------------------|-----------------|------|-----------------------|------|---------|------------------------|---------|------------------------|---------|
|                                                                                                                   | MOVE Group (IG)             | %    | Comparison Group (CG) | %    | p value     | Impact survey responses    | MOVE Group (IG) | %    | Comparison Group (CG) | %    | p value | Overall change IG-IG % | p value | Overall change CG-CG % | p value |
| I have the time to ask women about FV during the 4 week consultation (56/53)                                      | 22 (agree)                  | 39.3 | 28                    | 52.8 | 0.16        | NA                         |                 |      |                       |      |         |                        |         |                        |         |
| <b>I find Child FIRST services responsive when I make a referral (56/53)</b>                                      | 14 (agree)                  | 25   | 25                    | 47.2 | <b>0.02</b> | NA                         |                 |      |                       |      |         |                        |         |                        |         |
| I find Child Protection services responsive when I make a referral (56/53)                                        | 19 (agree)                  | 33.9 | 27                    | 50.9 | 0.07        | NA                         |                 |      |                       |      |         |                        |         |                        |         |
| I play my part in addressing the Councils goal of responding to FV in our area (52/50)                            | 45 (agree)                  | 86.5 | 41                    | 82   | 0.53        | (53/52)                    | 45              | 84.9 | 43                    | 82.7 | 0.76    | ↓1.6                   | 0.81    | ↑0.7                   | 0.93    |
| I feel that the Council does not recognise the importance of the work that we nurses do in relation to FV (52/50) | 15 (agree)                  | 28.8 | 15                    | 30   | 0.9         | (53/52)                    | 15              | 28.3 | 19                    | 36.5 | 0.37    | ↓0.5                   | 0.95    | ↑6.5                   | 0.48    |

## Reflexive monitoring

|                                                                                             | Interim Survey (S1) Results |      |                       |    |              | Impact Survey (S2) Results |                 |      |                       |      | Difference |                                   |         |                                   |         |
|---------------------------------------------------------------------------------------------|-----------------------------|------|-----------------------|----|--------------|----------------------------|-----------------|------|-----------------------|------|------------|-----------------------------------|---------|-----------------------------------|---------|
|                                                                                             | MOVE Group (IG)             | %    | Comparison Group (CG) | %  | p value      |                            | MOVE Group (IG) | %    | Comparison Group (CG) | %    | p value    | Overall change IG-IG % difference | p value | Overall change CG-CG % difference | p value |
| We get useful feedback about how well we are doing in our work with FV at team meetings     | NA                          |      |                       |    |              | Agree (54/52)              | 19              | 35.2 | 11                    | 21.2 | 0.11       |                                   |         |                                   |         |
| <b>Our team has adequate opportunities for supervision with this difficult work (52/50)</b> | 25(agree)                   | 48.1 | 38                    | 76 | <b>0.004</b> | (54/52)                    | 33              | 61.1 | 37                    | 71.2 | 0.28       | ↑13                               | 0.18    | ↓4.8                              | 0.58    |

CALD-Culturally and Linguistically Diverse

Child FIRST – Family Information, Referral and Support Teams

NA - Question not asked at this time point

Significance at  $p < 0.05$  \* Fisher's exact test
